# Supplementary material for: The coexistence of traditional medicine and biomedicine: A study with local health experts in two Brazilian regions
Source: PubMed Central journal article supplement (PMC5393556; doi:10.1371/journal.pone.0174731), 2017-04-17
Supplement: pone.0174731.s001.pdf [file pone.0174731.s001.pdf]

## INTERVIEW PROTOCOL - LOCAL SPECIALISTS

Researcher: Sofia Zank

|                                                   |
|---------------------------------------------------|
| Name of the interviewer: _____ Date: _____        |
| Area of Study: _____ Community: _____             |
| House number: _____ Number of the interview _____ |

1. Name: \_\_\_\_\_ (*information kept anonymously. The name is just for the interviewer's reference*) 2. Gender: \_\_\_\_\_ 3. Age: \_\_\_\_\_

4. Occupation/activity \_\_\_\_\_ 5. How long have you lived here? \_\_\_\_\_

6. Expert in: \_\_\_\_\_

7. What local health practices take place in the community (healers / raizeiros / rituals)? Do you perceive changes (number of specialists, demand, valorization ...) in these practices over time?

8. Has the use of medical resources for the health processes changed? Did any changes occurred in access to medical resources?

9. Do you take industrialized medicines? Which (type of disease)?

No  Yes

Health problem: \_\_\_\_\_

Health problem: \_\_\_\_\_

Health problem: \_\_\_\_\_

10. Indication of other experts:

11. What plants do you know?
